# Supplementary material for: Global contributions of mesoscale dynamics to meridional heattransport
Source: Copernicus journal article supplement (doi:10.5194/os-2021-9), 2021-02-02
Supplement: Supplementary file [file os-2021-9-AC3-supplement.pdf]

### Response to review comment #3:

The study presents findings about the contribution of mesoscale dynamics to the global meridional heat transport in the Parallel Ocean Program 2 ocean model. Contrary to most previous papers that use filters in the time domain to isolate the mesoscale signal, the authors use a spatial filter to separate velocity and temperature fields into overturning, large scale and mesoscale components. They identify global patterns and key regions with significant eddy heat fluxes and address the variability of eddy heat fluxes on interannual to decadal time scales.

Overall, I think the results and questions raised by the paper are very relevant for the community. However, some improvements are necessary before I can recommend the paper for publication.

Thanks very much to the reviewer for their comments. We have described our revisions to the manuscript to address these comments below. Note: The responses to each of the comments are given in red text. Line numbers in the responses refer to the “tracked changes” version of the revised manuscript, so the line numbers are different in the version without tracked changes.

#### General comments:

- While I think the spatial separation into OT, M and L component is definitely interesting and should be further studied, I am not yet convinced that the method (at this stage) is “better” or “worse” than separations in the time domain. For example, section 3.3 shows that the largest signal in regions of high MHT stems from stationary transport in the western boundary currents (which would not be considered mesoscale when separating the scales in time domain). In my eyes it is at least questionable whether the time mean heat flux of a boundary current (even if it is only a few hundred km wide) should be considered an “eddy signal”. Section 4 shows the differences between the methods (which is definitely very interesting), but there are no reasons provided for the observed differences and no evaluation of which method delivers the more realistic results.

Which method delivers more “realistic” results depends on the question that is being investigated. In this study, we focus on quantifying the impact of mesoscale dynamics, rather than exclusively eddies, or the time-varying contribution. There are two main motivations for this focus:

- (1) As discussed in the introduction (line numbers 58-61), climate models often do not resolve the oceanic mesoscale, and need to parameterize their impacts. Spatial (not temporal) scale is generally the limiting factor that prevents these models from simulating eddies and other mesoscale phenomena (this is why the spatial resolution of models is mentioned much more often than their timestep). If the models are limited by spatial scale, then it is not only the effects of time-varying eddies that need to be parameterized, but also the effects of stationary mesoscale recirculations. Effective diagnostics are needed to quantify the fluxes associated specifically with mesoscale spatial scales. These diagnostics can be applied to models that *can* resolve these scales, to constrain the parameterized fluxes in models that *can not* resolve the mesoscale. This is discussed in Section 6: “By implementing this diagnostic to separate scales in mesoscale-permitting

and mesoscale-resolving simulations, it is possible to better understand how stationary and transient mesoscale phenomena induce fluxes across large-scale gradients. Future studies can focus on relating large-scale gradients (in one, two, and three dimensions) to mesoscale diffusivities, and therefore on improving parameterizations of mesoscale impacts from stationary recirculations as well as propagating eddies.” (line numbers 563-567)

- (2) Despite abundant work on parameterizations of mesoscale-induced lateral mixing (e.g., Gent and McWilliams 1990; Eden and Greatbatch 2008; Marshall et al. 2012), an intuitive understanding of how energy at mesoscales relates to tracer fluxes is still needed. Stationary mesoscale phenomena (such as boundary current recirculations) are quite different structurally from transient eddies, but both are forms of nonlinear mesoscale turbulence. As discussed in the introduction:

“Unlike the wind-forced response associated with larger-scale gyres and planetary waves, these mesoscale phenomena are generated and sustained by nonlinear mechanisms such as baroclinic and barotropic instability (e.g., Eady, 1949; Charney and Stern, 1962) and nonlinear momentum advection (e.g., Greatbatch et al., 2010).” (line numbers 27-30)

By developing diagnostics to isolate the fluxes associated with both stationary and transient mesoscale flows, we can better understand why an increase in mesoscale energy may not increase the mesoscale flux (as suggested in Section 5.2), or even why upgradient fluxes might occur.

- Using a fixed value of  $10^\circ$  longitude to separate between the large scale and mesoscale components of temperature and velocity fields poleward of  $20^\circ$  seems quite large. It should be appropriate in mid-latitudes, but the model domain extends far into the subpolar regions where eddy scales are much smaller. How sensitive are the results to this choice?

To be clear, the scale we are referring to is wavelength; the wavelength of an eddy field is approximately 4 times the radius of a given eddy. Hence, a typical eddy radius of 120 km at  $20^\circ$  latitude (Chelton et al. 2011 figure 12) corresponds to a wavelength of 480 km or  $4^\circ$ - $5^\circ$  longitude.

However, we intentionally chose a threshold for separating the large scale and mesoscale that is much larger than typical eddy scales (e.g., Chelton et al. 2011). In early uses of this methodology we tried a threshold that was closer to typical eddy scales, but some of the variability associated with larger eddies was leaked into large scale  $v$  and  $T$  profiles. It can be seen in the spectra of meridional velocity (Fig. 2 in old manuscript, moved to supplement) that the mesoscale peak is fairly broad. The velocity spectra show that variance remains elevated from the mesoscale peak (at  $\sim 4^\circ$  wavelength) to almost double this scale (panel e in the spectra plot). A separation scale of  $10^\circ$  longitude (and larger near the equator) therefore assures that larger eddies will still be classified as mesoscale, and be treated distinctly from gyre-scale motions and long planetary waves. Moving poleward from  $20^\circ$  to  $60^\circ$ - $65^\circ$  latitude, the spectra plots also show that the scales of the

mesoscale peak and transition remain fairly consistent in degrees longitude. This is because the reduction in eddy length scales at mid-to-high latitudes occurs at a similar rate to the reduction in spacing between lines of longitude. So the eddy scales are much smaller at 60° than 20° latitude, but not when measured by degrees longitude.

See also this quote added to Appendix A:

“The wavelength (not radius)  $\lambda_0$  was deliberately chosen to be larger than the size of nearly all eddies, in order to ensure that their signals are retained in the mesoscale. For instance, an eddy radius of 1° longitude and diameter of 2° is typical at mid-latitudes (Chelton et al. 2011), corresponding to a wavelength of 4° longitude. If  $\lambda_0$  at mid-latitudes is 4° or 5° longitude, much of the signal of larger eddies will be included in the large-scale profiles along with basin gyres and long planetary waves. Hence a choice of  $\lambda_0 = 10^\circ$  results in a cleaner separation of these phenomena.” (line numbers 601-605)

- The paper is quite long, and I find some parts and especially some figures more distracting than helpful. The story needs to be streamlined to focus more closely on the main results and their relevance. For example:

- section 2.3 includes 6 plots, but it did not convince me that 10° longitude is indeed a good scale for the separation of large- and mesoscale

In order to streamline and focus the paper more on the key results, this figure has been moved out of the main body of the paper to Appendix A.

- section 3.1 only shows that the model gets the general ocean circulation right, that should be a given for an ocean model and is not relevant for the results of this study

This figure is being removed for the sake of brevity.

- section 5.1 has 14 individual time series plots that basically only show when total MHT and mesoscale MHT are in phase. They are also really hard to read on a printout

This figure has been pared down significantly, to show only the 4°N transect in the Indo-Pacific basin, and the influence of ENSO on the mesoscale contribution to meridional heat transport.

#### **Detailed comment list:**

Line 13: This assumes that  $dT/dy$  and mixing length are constant (compare line 340), which is a strong assumption. Maybe rephrase to something like “surface EKE alone is not a good proxy...”

Yes, this change has been implemented. (lines 16-17)

Line 42: I would suggest adding Sun et al. (2019) as a reference here. They did a global analysis regarding the importance of the different transport mechanisms (swirl vs advection)

This reference has been included. (line 46)

Line 51: If the recirculation is 100% perfectly stationary, it would be “invisible” in a time filtered mesoscale component, but it would show in the time-mean component. And if there are small fluctuations in  $v$  and  $T$ , there can be covariance and thus an “eddy” heat flux.

Yes, the effects of “wobbles” in boundary currents and associated recirculations would be included in a time-varying temperature flux. But even the fluxes associated with perfectly stationary mesoscale recirculations will still need to be parameterized in coarse-resolution models that do not resolve them.

Line 65: A visual comparison is not a validation

The word “validation” has been changed to “assessment” in this section title.

Line 68: How many depth levels?

The text is augmented to say “The model simulation has 62 depth levels with 10 meter vertical spacing in the upper 160 meters”. (line numbers 87-88)

Line 70: If I understand the tripolar grid correctly, “progressively finer” is quite misleading here. The resolution is still  $0.1^\circ$ , but due to the convergence of the grid towards the two poles, the distances (in km) between two grid cells become smaller. It might be helpful to compare the grid resolution in km to the local Rossby radius to check where the model resolution is fine enough to resolve eddies (see e.g., Wekerle et al. (2017), their Fig. 2).

The text has been revised to give a sense of the grid spacing at higher latitudes: “...progressively finer grid spacing approaching the two north poles. In physical distance, the grid spacing is approximately 11 km grid spacing near the equator, 5.5 km at  $60^\circ\text{S}$  and 5-7.5 km grid spacing at  $60^\circ\text{N}$ . Given this spacing relative to the baroclinic deformation radius (e.g., Hallberg 2013; Wekerle et al. 2017), it is expected that the model should at least permit mesoscale instability development equatorward of  $50^\circ$ - $60^\circ$  latitude.” (line numbers 83-87)

How is the tripolar grid considered when calculating the temperature fluxes? Is the velocity field rotated to north or are the deviations between perpendicular to the grid line and north so small that it does not matter?

The following text has been added to Section 2.2 on the methodology: “In this analysis, transects are extracted from the model output along tracks corresponding to the nearest grid faces to integer lines of latitude. In the non-Mercator portions of the grid in the Northern Hemisphere, this results in a zig-zag of the transect through the model grid, but in this way the net volume

transport through each transect is conserved.” (line numbers 145-147)

I also think this section should focus more on the model with respect to its “eddy capability”, how well and where the model represents mesoscale processes (comparison with EKE is a good start). With  $1/10^\circ$  horizontal resolution the model can’t be considered eddy resolving everywhere, so there will still be sub grid-scale processes that aren’t resolved by the model. How does that affect the interpretation of the results? How are they parameterized on the sub grid-scale? What is the eddy diffusivity and viscosity for lateral mixing and diffusion in the model simulation?

The following text has been added to Section 2.1:

“One possible explanation is that the biharmonic viscosity  $\nu_0 = 2.7 \times 10^{10} \text{ m}^4 \text{ s}^{-1}$  and diffusivity  $\kappa_0 = 3 \times 10^9 \text{ m}^4 \text{ s}^{-1}$  values used in this model simulation are well tuned for energetic regions such as western boundary currents, but may suppress too much mesoscale activity in the less energetic ocean interiors.” (line numbers 104-106)

Composite estimates of MTF and heat transport have also been computed using a subset of times in the model output. In regions where POP underestimates EKE, higher EKE times are composited so that the EKE time average during the composite periods is closer to the values from altimetry. These composites and an explanation of them are discussed in Appendix B.

Fig. 1: I am a bit surprised by how much lower the model EKE is when compared to CMEMS altimetry. Why is the model velocity field filtered (wavelengths  $< 0.5^\circ$ )? Would that explain the low EKE? What filter is used here? The same 1D zonal filter as described in 2.2 or a different one?

The filter that is used is a two-dimensional (zonal and meridional) application of the low-pass filter in eq. (6), and this is indicated in the figure caption.

The following text has been added to the discussion of Figure 1: “The underestimation of EKE in POP persists even if a different filter wavelength is applied to both model and altimetry datasets (e.g.  $1^\circ$ ), and indicates a consistent low bias of mesoscale activity in lower-energy parts of the ocean interior.” (line numbers 102-104)

Line 90: The separation happens before integration

This is clarified in the text: “In the spatial decomposition used in this study, the meridional temperature flux at each depth level is decomposed into zonal mean and zonal deviation components...The overturning component, when multiplied by  $(\rho)(c_\rho)$  and vertically integrated, gives the portion of meridional HT associated with basin-wide vertical gradients in meridional flow and temperature.” (line numbers 125-131)

Line 92: What about the z-direction? Are all values depth integrated or is this separated at every depth level and then integrated over z? Is the heat transport integrated over the full water column or limited to the surface?

The decomposition occurs at each depth level, before vertical integration; this is clarified in the text (quote above; line numbers 125-126).

Line 110-117: What is the benefit of using this particular filter method compared to other filters? E.g. Zhao et al. (2018) use a Butterworth window for their filter?

The results are not particularly sensitive to the exact filter used, provided the roll-off of the filter is not too steep in either physical or spectral (wavenumber) space, so that any ringing is minimized. The form of the filter in equations (5)-(6) is chosen as the low-pass and high-pass forms of the filter are symmetric to each other (this can be seen by comparing eq. 5 & 6), and there is one easily-varied parameter  $s$  that can be tested to find optimal roll-off at the separation scale. In this case we settled on a value of  $s = 5$ . This is mentioned in the revised text: “The forms of the low-pass (6) and high-pass (7) filters are symmetric and contain a steepness factor  $s$  that affects the rate of signal roll-off near the cutoff wavenumber...In filtering for large-scale and mesoscale  $v$  and  $T$ , a value of  $s = 5$  was selected as an optimal balance of roll-off between the physical coordinate and spectral wavenumber domains.” (line numbers 154-159)

Line 118: What about Zhao et al. (2018)? If this is what inspired using the spatial filter, maybe put this in the introduction or the beginning of section 2.2

The reference to Zhao et al. (2018) has been moved to before the spatial decomposition is introduced:

“This method was used by Delman and Lee (2020), following a similar application of spatial filters by Zhao et al. (2018), but with the additional separation of the overturning contribution and corrections to the filtered  $v$  and  $T$  profiles near lateral boundaries.” (line numbers 119-121)

Line 119: Despite checking Delman & Lee (2020), I am not quite sure how the filter handles the basin boundaries. From Delman & Lee (2020): “Meridional velocity outside the basin boundaries (to a distance of  $1/k_0$  from the outermost boundaries) and within interior land areas is set to zero.”, “a buffer is also included at the western and eastern boundaries”, “in order to conserve the large-scale structure of zonally integrated  $v$ , this non-zero  $v_L$  needs to be redistributed over nearby water areas in the transect.”. I must admit don’t understand what has been done here exactly and I am not sure if all three steps are there to correct errors at the boundaries. However, getting the signal at the western boundary currents right is incredibly important since they are so dominant but confined within a small distance to the coast. I would therefore suggest clarifying this here.

The quotes the reviewer included from Delman and Lee (2020) refer to three steps that we have taken at the boundaries to improve both transect-integrated conservation of volume within each component, as well as local representation of the large-scale and mesoscale separation. These steps, plus the channel correction also described in Delman and Lee (2020), are applied either before or after the filters. Text has been added to the revision to briefly describe these corrections:



“To better preserve zero net volume/mass flux in the basin-integrated  $v_L$  and  $v_M$  components, our method incorporates boundary and channel corrections (described in more detail in Delman and Lee, 2020). These corrections also aim to improve local representation of the large-scale/mesoscale separation near boundaries and in narrow channels. Before filtering, (1)  $v$  profiles over land areas are set to zero, and (2) a buffer is applied to temperature profiles over land areas near boundaries to avoid sharp swings in  $T_L$ . After filtering, (3) non-zero  $v_L$  and  $v_M$  that leaked onto land areas is returned to water areas, and (4) within channels bounded by bathymetry that are narrower than  $\lambda_0/4$ , the meridional velocity profiles are set to  $v_L = v$  and  $v_M = 0$ . Steps (1), (3), and (4) are taken in order to improve conservation of volume along the transect, while steps (2) and (3) improve the local representation of the large-scale and mesoscale separation.” (line numbers 166-186)

Line 120-124: Is  $\lambda_0/4$  a good choice here? How do you separate the signal in a channel narrower than  $\lambda_0$  into scales larger and smaller than  $\lambda_0$ ?

Note the text added to the end of Section 2.2:

“Regarding the rationale for step (4), at most latitudes (Figure A1), mesoscale activity peaks near wavelength  $\lambda_0/2$ , so  $\lambda_0/4$  is approximately the diameter of a typical mesoscale eddy. Channels narrower than  $\lambda_0/4$  are therefore too narrow to support typical mesoscale instabilities, but transport in these channels can contribute substantially to the large-scale circulation (e.g., Indonesian Throughflow, Gulf Stream in the Florida Strait). Hence all of the transport in these narrow channels has been assigned to the large-scale component.” (line numbers 186-202)

Line 131: As mentioned above (general comment 2),  $10^\circ$  longitude for the separation between large- and mesoscale seems quite large. For example,  $10^\circ$  longitude at  $50^\circ\text{N}$  this is more than 700km. How does that compare to eddy diameters at this latitude? How sensitive are the results to this choice?

Eddy diameters at most latitudes are typically on the order of  $\lambda_0/4$  as explained in the quote above. The results are not very sensitive to slight variations in  $\lambda_0$  on either side of  $10^\circ$ , but if  $\lambda_0$  was chosen to be  $5^\circ$  longitude instead (and this was attempted), a significant portion of the eddy  $v$  and  $T$  profiles would be leaked into the large-scale component. See the quote added to the text below in Appendix A, and also the response to general comment 2.

“The wavelength (not radius)  $\lambda_0$  was deliberately chosen to be larger than the size of nearly all eddies, in order to ensure that their signals are retained in the mesoscale. For instance, an eddy radius of  $1^\circ$  longitude and diameter of  $2^\circ$  is typical at mid-latitudes (Chelton et al. 2011), corresponding to a wavelength of  $4^\circ$  longitude. If  $\lambda_0$  at mid-latitudes is  $4^\circ$  or  $5^\circ$  longitude, much of the signal of larger eddies will be included in the large-scale profiles along with basin gyres and long planetary waves. Hence a choice of  $\lambda_0 = 10^\circ$  results in a cleaner separation of these phenomena.” (line numbers 601-605)

What about filtering in the meridional direction? The final section mentions the rotational and

divergent eddy fluxes, but does it also affect the meridional coherence of the eddy heat transport if the underlying fields are only filtered in the zonal dimension? (I don't know the answer to this question.)

The filters used to separate the large-scale from mesoscale  $v$  and  $T$  are only applied in the zonal direction. Despite this fact, there is little evidence for significant abrupt breaks in the meridional coherence of MTF or the mesoscale contribution to HT. While applying a meridional filter might have an impact on the results in a few areas, it was decided for computational ease to only apply the filters zonally.

Fig. 2: How is the “mesoscale transition computed using the logarithmically smoothed spectral density” defined? What is the smoothing applied to the spectra? Why are 5 plots for the Indo-Pacific shown and none for the Atlantic? Since the same filter is applied globally, wouldn't it be enough to show one plot per latitude, or maybe even just one  $k/\text{lat}/\text{spectrum}$ -plot, where color represents the spectral density?

The spectral plots (former Figure 2, now Figure A1) have been moved to a supplement, in order to avoid distraction from the paper's focus on the mesoscale contribution results. The spectra have cleaner results when applied to each basin individually rather than along one transect globally, avoiding contamination from abrupt jumps that may occur at the boundaries. The idea of a  $k/\text{lat}/\text{spectrum}$  plot is interesting, but the change in spectral slope from the transition scale to the mesoscale bump/peak is more easily visualized when the spectra are plotted as lines.

Section 3.1 I think this whole section is unnecessary (see general comment 4). I would assume that an ocean model has gyres.

This section has been removed in the revised manuscript.

Line 147: I find the title “spatial components” of meridional HT a bit odd (because my mind automatically goes to spatial patterns and maps), but I don't have a better idea

The title has been changed to “Spatial decomposition of meridional HT”. We agree that the term “spatial” could be more precise, but have not thought of a preferable alternative. “Zonal decomposition of meridional heat transport” is one possibility; more precise, but also potentially confusing with the juxtaposition of zonal and meridional.

Section 3.2 I would suggest restructuring this section starting with the maps (pointwise temperature flux) and then looking at the integrated values (basin wide heat transport). But that might just be personal taste

In the revised manuscript, the figures have been reordered as suggested.

Line 150: Is this related to eddies in the Agulhas Retroflexion?

The maximum magnitude mesoscale contribution at  $40^\circ\text{S}$  is due not so much to the retroflexion itself, but to eddies that form in the Agulhas Return Current and in the Brazil-Malvinas



Confluence region. As stated in the revised text: “The largest magnitude mesoscale contribution to meridional HT at any latitude is at 40°S, with a poleward heat transport (-0.6 PW) powered by strong MTFs in the Brazil-Malvinas Confluence and Agulhas Return Current regions (Figure 2).” (line numbers 367-370)

Fig. 4/5: Both figures have different y-ranges for the different ocean basins, which is a bit misleading. Where does the residual term come from? How is the transport integrated in the southern region? From South America to South America? And in the ACC?

The axis limits of these figures (Figures 7 and 8 in the revised manuscript) have been aligned so that they are the same in all panels. The residual term indicates the effect of high-frequency (timescales <5 days) co-variations in  $v$  and  $T$  that can not be spatially decomposed; this is described in the caption of Figure 7 in the revised text. In the southern region we integrate from 70°W across all longitudes to 70°W, though the choice of starting and ending point do not matter as long as they are the same.

Fig. 4: I am not so familiar with the Indian Ocean, but is it standard practice to ignore Australia and the Indonesian islands and just integrate over everything?

The Indian and Pacific basins are sometimes integrated together (e.g., Volkov et al. 2008) because HT is only physically meaningful when integrated across a transect through which the volume transport is negligible. This is true of the Atlantic, where the only non-zero volume transport in basin integrals is the Bering Strait overflow (~1 Sv). However, because of the Indonesian Throughflow (~15 Sv), the southern Indian and Pacific basins both have large volume transports, and integrating them together largely eliminates this problem.

Fig. 5: Why show the ID standard deviation here and not in the section titled “mesoscale interannual/decadal variability”?

We understand that the figure could also be grouped with the interannual/decadal variability maps, but thought that the manuscript flows better if the basin-integrated meridional HT plots are shown in sequence.

Line 179: How are these filter parameters chosen? Are the results sensitive to the choice?

For this smoothing filter, a threshold wavelength that is larger than the large-scale/mesoscale separation, in order to remove most of the rotational fluxes associated with the mesoscale. The value of  $s = 2$  has a more gradual wavelength roll-off than the  $s = 5$  used to separate the large-scale and mesoscale, since the objective of the smoothing is not to separate distinct spatial scales but to show the spatially-smoothed regional behavior of the MTF. As stated in the revised text: “In the smoothing filter the steepness factor  $s$  is also set to 2 (rather than 5), because the smoothing effect is more important here than the precision of the wavelength cutoff.” (line numbers 267-268)

Fig 6: The colors seem to be quite oversaturated. Are the limits of the colorbar appropriate for the data?

This figure has been removed from the revised manuscript.

I am very surprised by the strong northward flux in the western Labrador Sea (Fig 6a). You mention that the “picture becomes more complex”, but is there an explanation for this pattern?

This figure has been removed from the revised manuscript.

Line 225: “intensified boundary current jet and flanking recirculation just to the east that is shown in vM” and later in line 228: “stationary MTF contributions are associated with western boundaries”; Wouldn’t that suggest that this is not really a mesoscale signal then? This relates to my general comment (1)

We make the case in this paper that jets and recirculations *are* mesoscale signals if their structures occupy similar spatial scales as mesoscale eddies, and their dynamics will not be fully resolved by coarse-resolution models. This reasoning has been described more fully in the revised text in Section 1, and is also explained in the response to your general comment 1.

Fig. 8: This figure seems to combine two thoughts and looks incredibly crowded to me. On the one hand, there is the separation into large- and mesoscale and on the other hand the separation into stationary and time-varying transport, leading to 12 subplots. Are the left and middle columns really necessary?

We agree with the reviewer that the figure was crowded, and the left and middle columns have been removed.

Why is the 95m depth level shown? Anything special about that layer?

The part of the figure that this comment refers to has been removed.

Fig. 9: This is basically just a zoomed in version of the middle column of Fig. 8. (at interesting locations). So maybe skip the middle of Fig. 8 and just show this? Why is the 95m depth level shown?

The left and middle columns of what was Figure 8 (Figure 5 in the revised text) have been removed.

Line 245: There are also methods looking at deviations from the seasonal cycle

Yes, fluxes can be decomposed into seasonal and non-seasonal components as well (e.g., to understand the contributions of advection by non-seasonal  $v$  and  $T$  to the seasonal cycle). This broadly fits under the umbrella of a temporal decomposition since  $v$  and  $T$  are separated using a time averaging operator. A brief mention of using the seasonal average has been incorporated into the discussion in Section 2.2. (line number 117)

Line 256: Mesoscale dynamics indeed have higher frequencies in lower latitudes leading to shorter eddy time scales there. You can also just look at eddy speeds along their trajectories for that.

Yes, the faster eddy propagation speeds have been mentioned in the text. (line number 409)

Line 261: Yes, that is indeed a problem. However, as shown in Fig. 8, the separation in the spatial domain makes the time-mean heat transport of the western boundary current an “eddy” signal, even though western boundary currents have very different dynamics from mesoscale eddies. See general comment 1.

This is a good point; the dynamics of planetary waves, western boundary currents (WBCs), and mesoscale eddies are all distinct, so why lump WBCs together with mesoscale eddies? One outcome of this paper is to identify characteristics of WBCs that have mesoscale spatial structure, the contributions of which may not be well represented in coarse-resolution climate models (see response to general comment 1).

The text has been revised to clarify the type of distinction we are referring to: “Hence the temporal eddy fluxes conflate the contributions of large-scale planetary wave activity and mesoscale eddy activity. In contrast, the mesoscale component isolates the contributions to meridional HT from fluxes that are not expected to be well represented in coarse-resolution climate models.” (line numbers 414-417)

Section 5.1 This section is again very long and consists of different ideas and concepts (first a map of STD, then time series, then linear regression), including 5 different figures and 18 subplots. What is the main message of this subsection? Can it be conveyed in simpler ways?

Most of the time series plots in this section have been removed to streamline the section and the manuscript as a whole. In the revised manuscript, the standard deviation plot is followed by the linear regression plot to illustrate where MTF variability actually contributes to overall meridional HT; then time series in the tropical Indo-Pacific are included to indicate the influence of ENSO on MTF in this region.

Line 278: “This indicates that mesoscale fluxes are not be particularly efficient at moving heat meridionally in subtropical eddy bands, at least in the POP simulation.” This could also be related to the small meridional temperature gradients in the subtropics

The small meridional temperature gradients are likely part of the story, and may also explain why the meridional HT remains largely unchanged even when only higher-EKE times are averaged (Figure B3). The typo in the above line has also been corrected.

Fig 13/14/15: Maybe show only the lower panels and focus on one section per basin? What is the reason for showing all these time series other than “sometimes mesoscale MHT and total MHT are in phase” The figures are super small and on a regular printout I can’t really say anything about them. Zooming into the pdf, I can say that I disagree with some of the red dashed lines (e.g., the last two events in Fig 15 b).

Most of the panels in these figures have been removed; only part of the middle figure has been retained to show the connection between ID variability in the tropical Indo-Pacific and ENSO.

Line 303-329: I am not quite sure if this part is needed. If it stays in the paper, it should probably have its own section because it is quite different from the analysis of the transport time series before.

Most of the time series have been removed, so that this section now focuses more specifically on the mesoscale variability and its regional distribution. The ID standard deviation map (Figure 11) is now followed by the regression map (Figure 12), and then the time series at one latitude (4°N) showing the influence of ENSO.

Line 320-323: Does this mean that the separation into large- and mesoscale is off in these regions?

Not necessarily; a change in the large-scale structure may precondition the background gradients on which the mesoscale fluxes occur. For example, if a large-scale current is more zonally-oriented than usual, the large-scale temperature flux in the meridional direction will be lower than usual, but the meridional gradient (and therefore probably the MTF) will be higher than usual. As stated in the text: “For instance, if the large-scale flow is less efficient than usual at advecting heat poleward (perhaps due to the orientation or intensity of the main current), mesoscale variability may take up more of this flux instead.” (line numbers 492-494)

Equation (13): I think this should be  $\sqrt{2EKE}$ , since  $EKE = 1/2(u^2 + v^2)$ , but for the question of correlation it doesn't matter

Indeed, we are only aiming to show proportionality rather than equivalence in equation (13), and as noted the factor of 2 or  $\sqrt{2}$  will not affect the correlation or fraction of variance explained. It is now stated explicitly in the text that equation (13) is only a statement of proportionality. (line number 517)

Line 340: Mixing length and background gradient vary in space and time. A shift of the GS axis in the North Atlantic for example completely changes the locations of the major temperature gradients.

The reviewer is correct of course, and the variation in mixing lengths and gradients is a likely cause of the poor correlation of EKE and MTF in energetic western boundary current regions. We have attempted to reduce the impact of the exact location of the jet axis on the EKE-MTF correlation, by using zonal smoothers on EKE and MTF. This is explained more clearly in the revision: “In this analysis, the zonal smoothing filter used on MTF in previous figures is applied to both EKE and MTF in order to reduce the impact of shifts in the location of currents and focus on the regional relationship between EKE and MTF.” (line numbers 519-521)

However, mixing length and background gradients are still more likely to vary in energetic regions such as the Gulf Stream, and the text emphasizes this possibility in the discussion: “Moreover, strong velocity jets tend to suppress diffusivity across fronts by reducing the mixing

length (Ferrari and Nikurashin, 2010); hence variations of the mixing length and background gradients unrelated to EKE interfere with the relationship between EKE and cross-frontal fluxes.” (line numbers 535-537)

Line 357: local covariance between  $v'$  and  $T'$  is the definition of eddy heat flux

The distinction between *covariance* and *correlation* is important. Covariance includes the magnitude of the  $v'$  and  $T'$  variations, while correlation focuses more on the “efficiency” of these variations in producing a net flux. This has been clarified in the text: “Ultimately the MTF depends not only on the level of mesoscale velocity and temperature variation, but on the local correlation between  $v_M$  and  $T_M$  (Delman and Lee, 2020), which in turn is a measure of the efficiency of mesoscale motions in producing a net directional flux. The factors affecting this  $v_M$ - $T_M$  correlation locally need to be investigated more in future work.” (line numbers 537-540)

## References:

Delman, A., & Lee, T. (2020). A new method to assess mesoscale contributions to meridional heat transport in the North Atlantic Ocean. *Ocean Science*, 16(4), 979–995.  
<https://doi.org/10.5194/os-16-979-2020>

Sun, B., Liu, C., & Wang, F. (2019). Global meridional eddy heat transport inferred from Argo and altimetry observations. *Scientific Reports*, 9(1), 1–10. <https://doi.org/10.1038/s41598-018-38069-2>

Wekerle, C., Wang, Q., Danilov, S., Schourup-Kristensen, V., von Appen, W. J., & Jung, T. (2017). Atlantic Water in the Nordic Seas: Locally eddy-permitting ocean simulation in a global setup. *Journal of Geophysical Research: Oceans*, 122(2), 914–940.  
<https://doi.org/10.1002/2016JC012121>

Zhao, J., Bower, A., Yang, J., & Lin, X. (2018). Meridional heat transport variability induced by mesoscale processes in the subpolar North Atlantic. *Nature Communications*, 9(1), 1–9.  
<https://doi.org/10.1038/s41467-018-03134-x>
